# Supplementary material
Source: publisher site journal article supplement (https://www.dovepress.com/article/280941)
Supplement: Supplementary file 1 [file get_supplementary_file.php]

# Appendix

**Chest Xray Interpretation E-learning resource Feedback Survey**

1. What is your year of study? (Please specify)

(Questions 2-5: 1-Strongly disagree, 2-Disagree, 3-Neutral, 4-Agree, 5-Strongly Agree)

2. The learning outcomes were appropriate to my year of study

3. The e-learning resource was easy to navigate

4. The texts and graphics were of good quality

5. The content met the learning outcomes

6. How would you rate this e-learning resource?

1 2 3 4 5 6 7 8 9 10

7. I would recommend this resource to a friend

Yes / No

8. What are the good aspects of this e-learning resource? (space provided for comments)

9. What would you like us to improve? (space provided for comments)
